# Supplementary material for: Nano-modified indium tin oxide incorporated with ideal microlens array for light extraction of OLED
Source: Royal Society of Chemistry journal article supplement (doi:10.1039/c9tc00195f), 2019-01-01
Supplement: c9tc00195f1.pdf [file c9tc00195f1.pdf]

## Supporting Information

### **Nano-modified indium tin oxide incorporated with ideal microlens array for light extraction of OLED**

**Jun-Gui Zhou<sup>+</sup>,<sup>a</sup> Xiao-Chen Hua<sup>+</sup>,<sup>a</sup> Yang-Kai Chen,<sup>a</sup> Yu-Yang Ma,<sup>a</sup> Chen-Chao Huang,<sup>a</sup> Yan-Dong Wang<sup>a</sup> and Man-Keung Fung<sup>\*ab</sup>**

<sup>a</sup> Jiangsu Key Laboratory for Carbon-Based Functional Materials & Devices, Institute of Functional Nano & Soft Materials (FUNSOM), Soochow University, Suzhou, Jiangsu 215123, P. R. China.

<sup>b</sup> Institute of Organic Optoelectronics, Jiangsu Industrial Technology Research Institute (JITRI), 1198 Fenu Dadao, Wujiang, Suzhou, Jiangsu, P. R. China.

Email: mkfung@suda.edu.cn

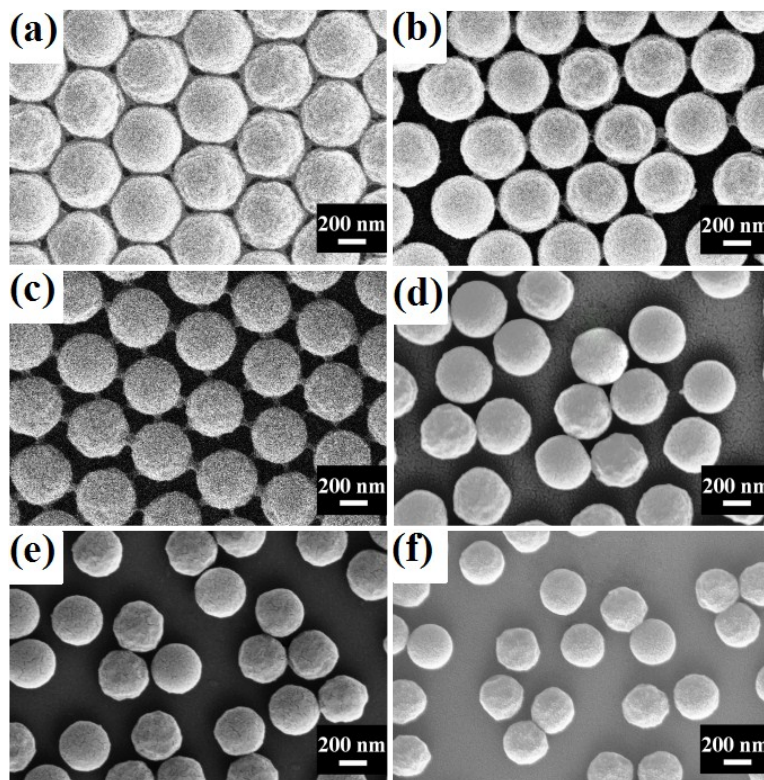

**Fig. S1.** Top-down SEM images of 520 nm PS spheres etched by different times: (a) 0 minute, (b) 2 minutes, (c) 4 minutes, (d) 6 minutes, (e) 8 minutes, and (e) 10 minutes.

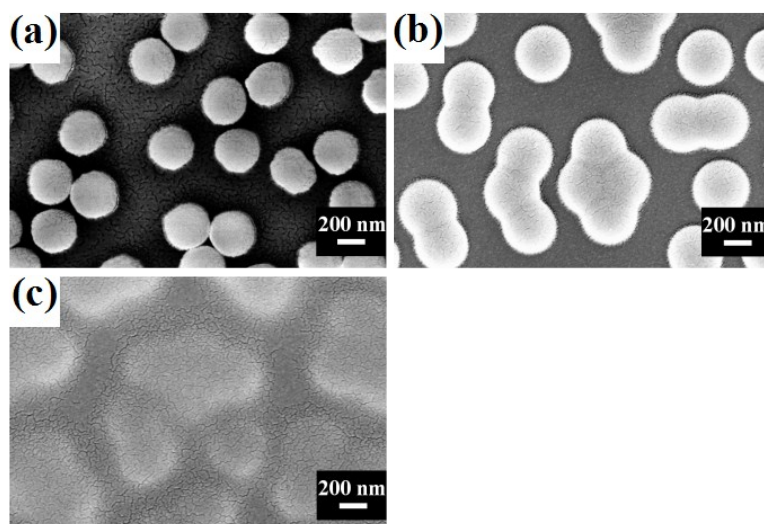

**Fig. S2.** Top-down SEM images of PS spheres which have been etched for 10 minutes and then subjected to various baking temperatures: (a) 100°C, (b) 150°C and (c) 200°C.

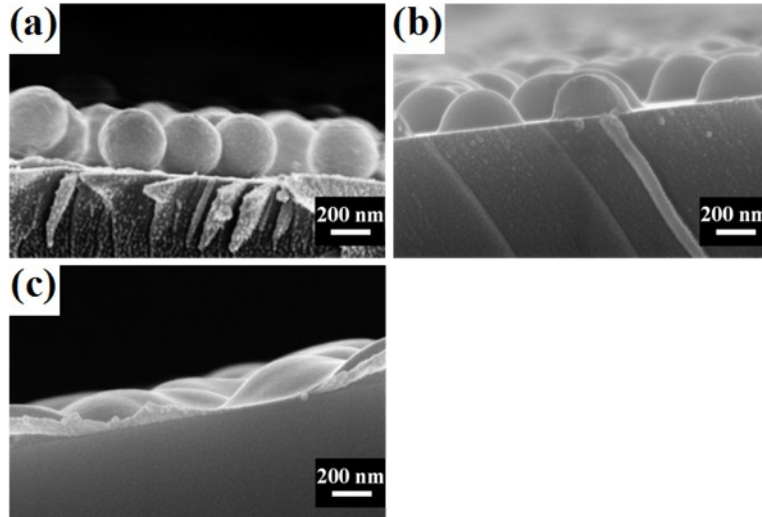

**Fig. S3.** Cross-section SEM images of PS spheres which have been etched for 10 minutes and then subjected to various baking temperatures: (a) 100 °C, (b) 150 °C and (c) 200 °C.

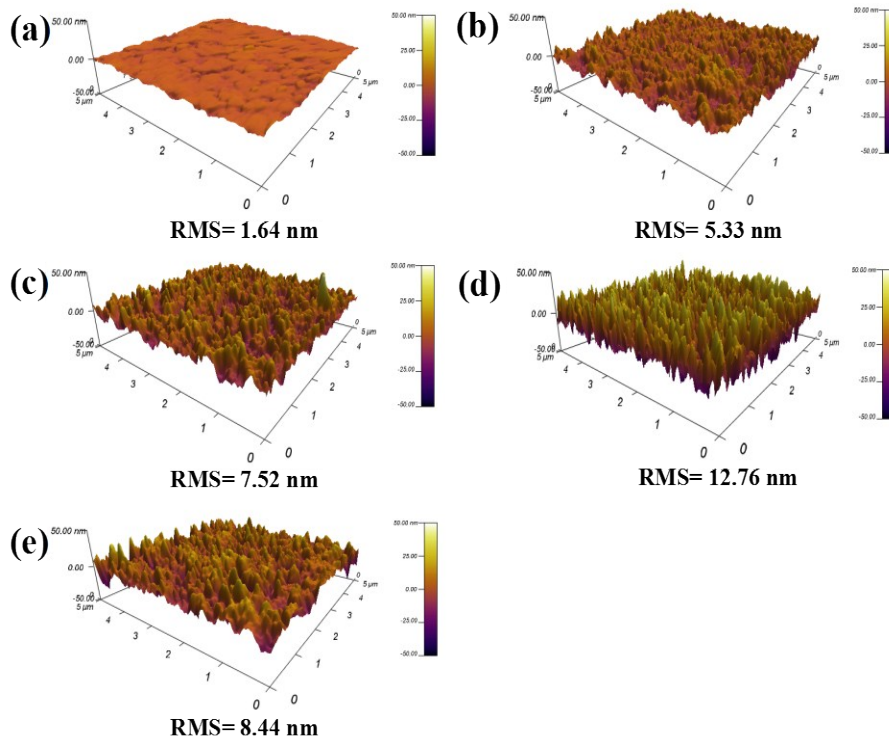

**Fig. S4.** AFM images of ITO glass substrates as a function of HCl etching time: (a) 0 minute, (b) 1 minute, (c) 2 minutes, (d) 3 minutes, and (e) 4 minutes. The root-mean-square (RMS) roughness is indicated below each image.

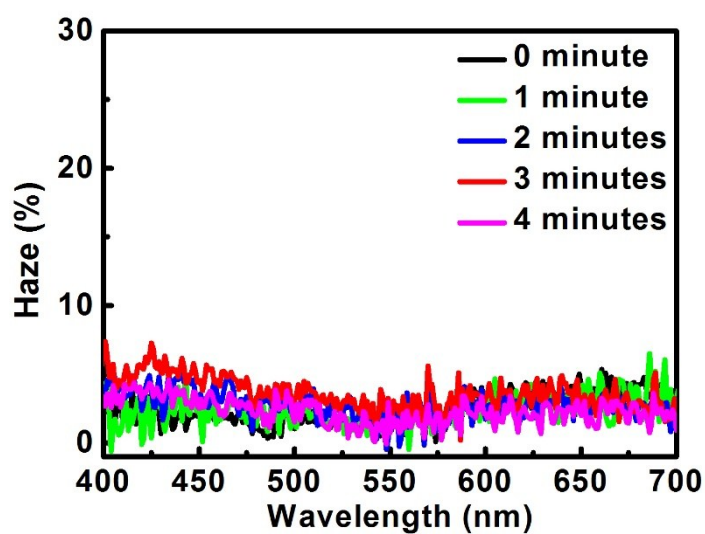

Fig. S5. Haze of the flat ITO (0 minute) and that etched with 1 minute, 2 minutes, 3 minutes and 4 minutes.

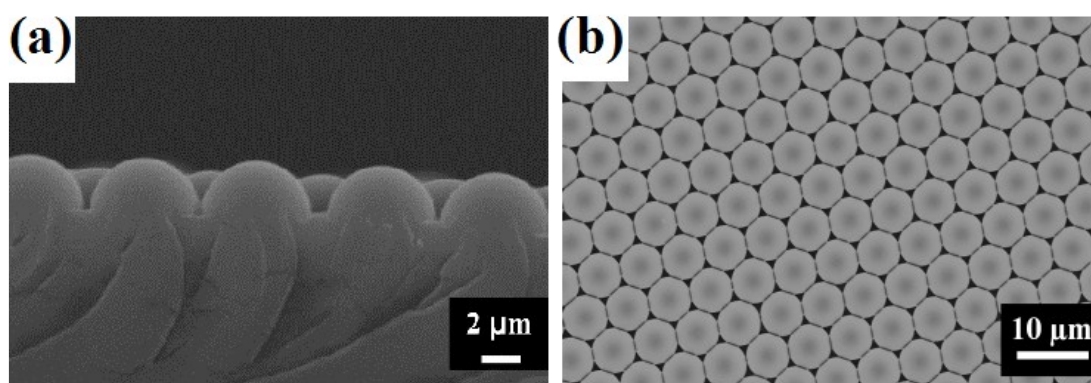

Fig. S6. (a) Cross section SEM image of IMLA. (b) Top SEM image of IMLA.

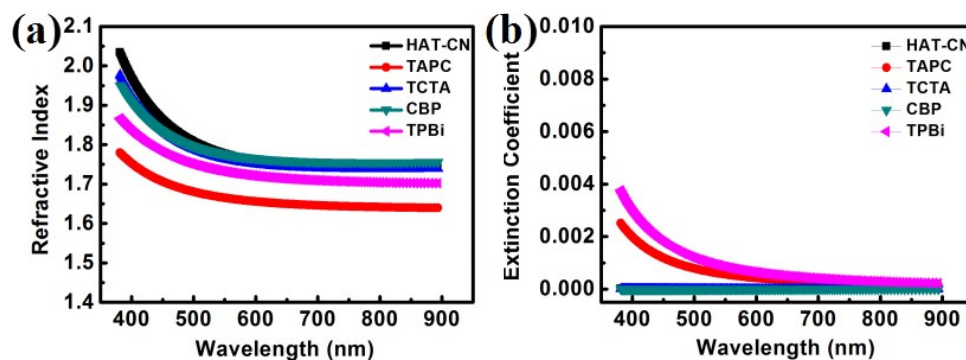

Fig. S7. Refractive indices (a) and extinction coefficients (b) of HAT-CN, TAPC, TCTA, CBP and TPBi Films.

Table S1. Brightness and CIE co-ordinates of various green-emitting devices. All devices were driven at a current density of 20 mA/cm<sup>2</sup>.

| Device | Brightness (cd/m <sup>2</sup> ) | CIE coordinates (x, y) |
|--------|---------------------------------|------------------------|
| D1     | 10960                           | (0.347, 0.614)         |
| D2     | 12740                           | (0.349, 0.615)         |
| D3     | 14170                           | (0.340, 0.624)         |
| D4     | 15030                           | (0.321, 0.636)         |
| D5     | 13580                           | (0.326, 0.631)         |
| D6     | 21620                           | (0.320, 0.637)         |
| D7     | 16690                           | (0.343, 0.618)         |
